# Supplementary material for: Effects of GHR Deficiency and Juvenile Hypoglycemia on Immune Cells of a Porcine Model for Laron Syndrome
Source: MDPI journal article supplement (doi:10.3390/biom13040597), 2023-03-26
Supplement: s1 [file s1]

Supplementary figure S1.

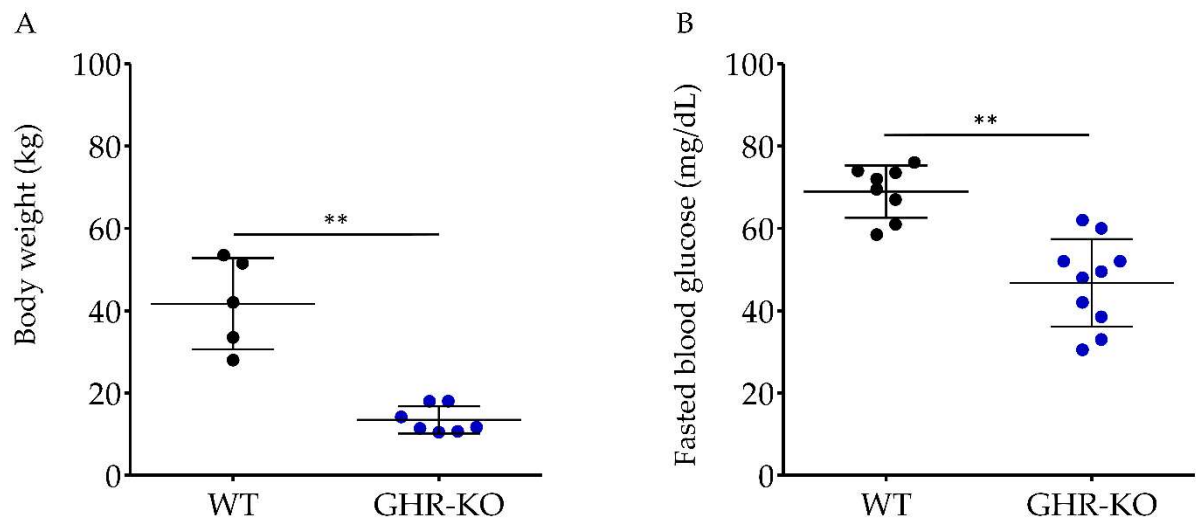

**Supplementary figure 1.** (A) Body weights of wild-type (WT) (black dots, n = 5, 4 females, 1 male) and growth hormone receptor knockout (*GHR*-KO) pigs (blue dots, n = 7, 6 females, 1 male) included in our study significantly differed. A previous study in *GHR*-KO pigs reported a reduction in body weight by approximately 63 % in comparison to WT pigs at an age of three months (Hinrichs et al., 2018). In line with this, *GHR*-KO pigs applied in this study had a body weight of  $13.5 \pm 1.3$  kg in comparison to  $41.7 \pm 5.0$  kg assessed in 5 WT pigs, which equals a reduction in weight by approximately 67%. (B) Fasted blood glucose levels of WT (black dots, n = 8, 5 females, 3 males) and *GHR*-KO pigs (blue dots, n = 10, 6 females, 4 males) significantly differed in our study. WT pigs displayed  $68.9 \pm 6.3$  mg/dL blood glucose while *GHR*-KO pigs displayed  $46.8 \pm 10.6$  mg/dL blood glucose, which is in line with the previous characterization of blood glucose levels of these pigs by Hinrichs et al., 2018. Data are shown as mean  $\pm$  SD; \*\*p < 0.001.

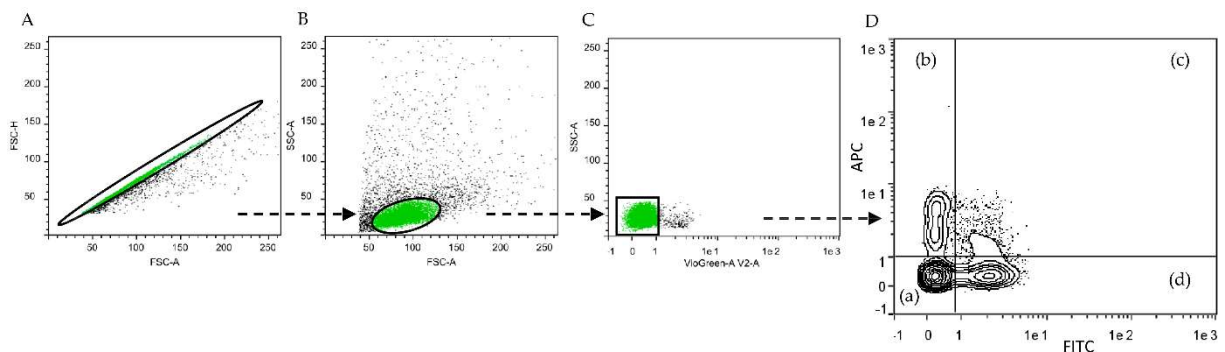

**Supplementary figure 2.** Hierarchical gating strategy for flow cytometry experiments. PBMC of wt and *GHR*-KO pigs were stained with Viobility 405/520 fixable dye (Miltenyi Biotech, Bergisch Gladbach, Germany) and measured with MACSQuant Analyzer 10 (Miltenyi Biotech). (A) Doublets were excluded by pulse geometry gating comparing area (FSC-A) and height (FSC-H). (B) Lymphocytes were identified by gating according to size (FSC-A) and granularity (SSC-A). (C) Viable cells were used in further analysis. (D) Gating strategy for viable singlets inside the lymphocyte gate. Exemplary gating strategy for (a) negative cells, (b) CD4<sup>+</sup>CD8 $\alpha$ <sup>+</sup> lymphocytes (c) CD4<sup>+</sup>CD8 $\alpha$ <sup>+</sup> activated/memory T cells, (d) CD4<sup>+</sup>CD8 $\alpha$ <sup>-</sup> cells.
